# Supplementary material for: The shared microbiota of humans and companion animals as evaluated from Staphylococcus carriage sites
Source: PubMed Central journal article supplement (PMC4335418; doi:10.1186/s40168-014-0052-7), 2015-01-23

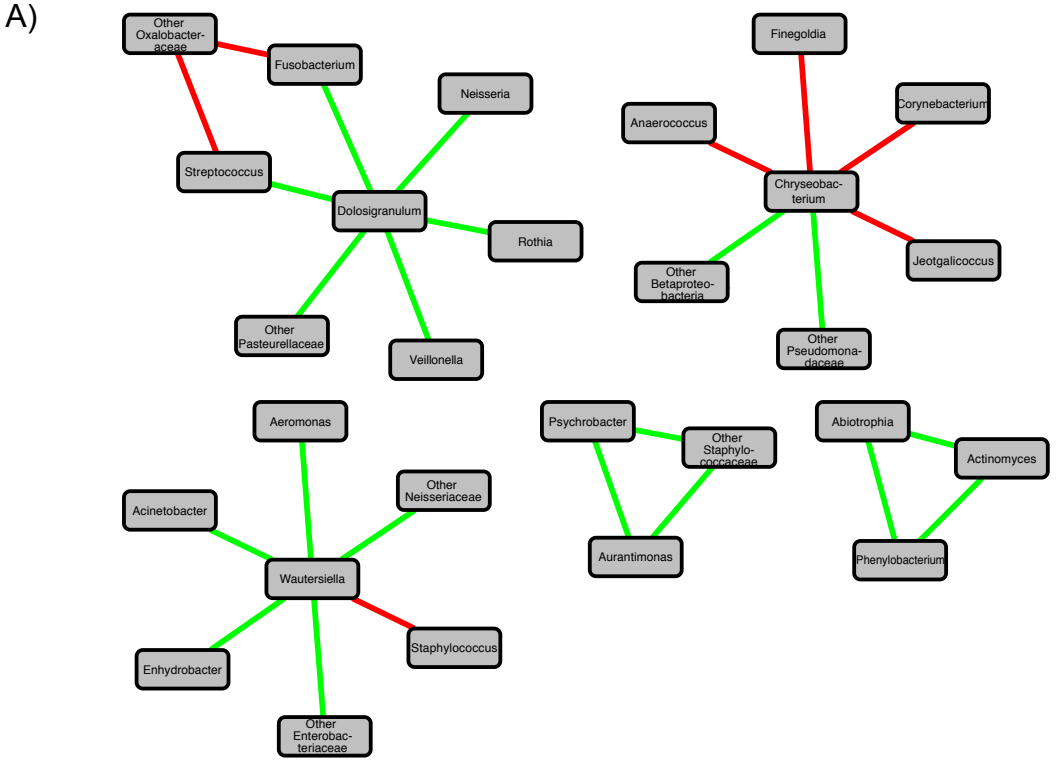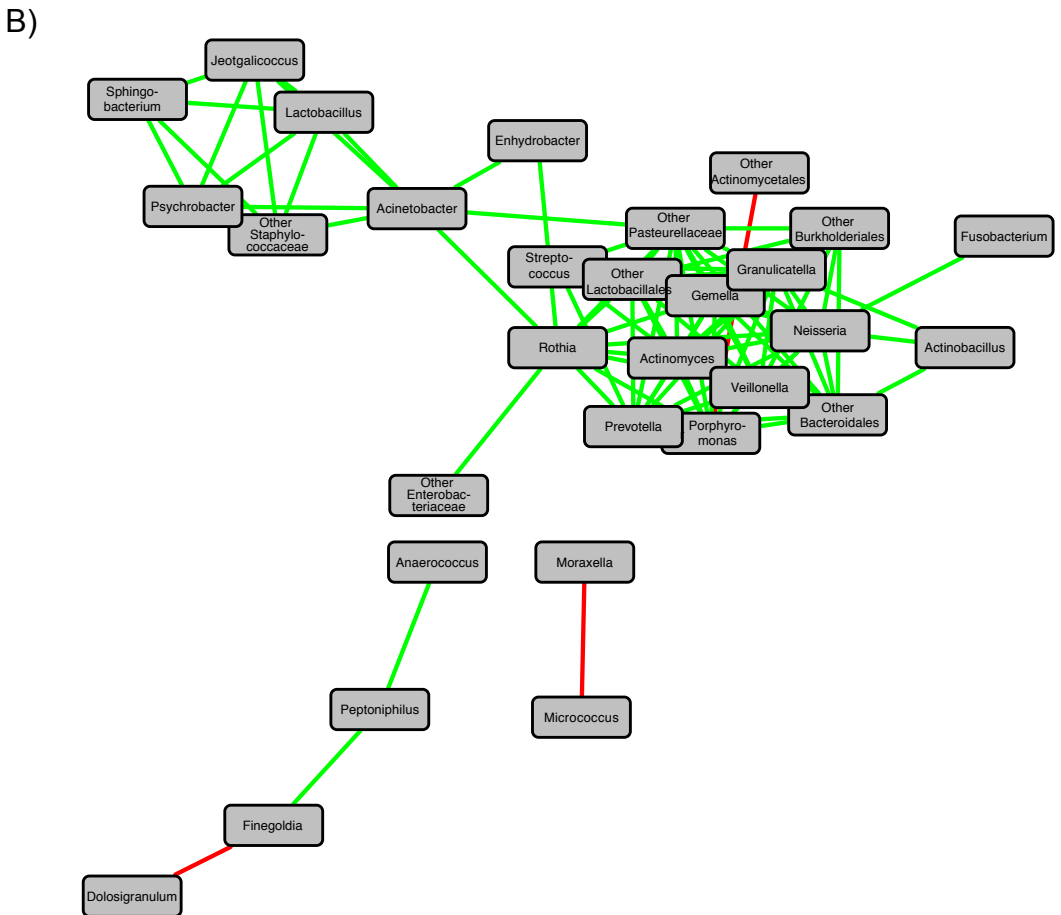

Supplement: 40168_2014_52_MOESM5_ESM.pdf [file 40168_2014_52_MOESM5_ESM.pdf]
